# Supplementary material for: A New Phenotype in Candida-Epithelial Cell Interaction Distinguishes Colonization- versus Vulvovaginal Candidiasis-Associated Strains
Source: PubMed Central journal article supplement (PMC10128025; doi:10.1128/mbio.00107-23), 2023-03-01
Supplement: mbio.00107-23-s0001.pdf [file mbio.00107-23-s0001.pdf]

A

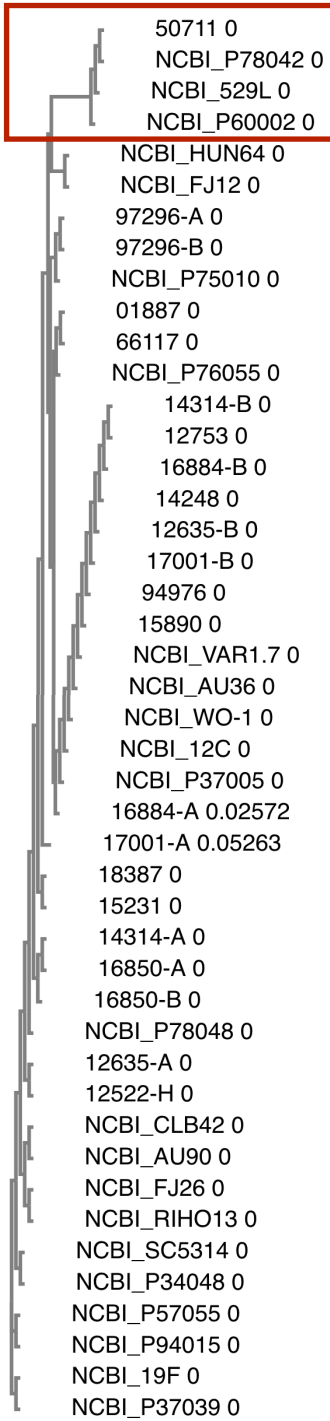

B

|                 |                                          |
|-----------------|------------------------------------------|
| 50711           | LAKRSFLSIITALLGNIPQIIQIIMGIVKAFKGNKRED   |
| NCBI_P78042     | LAKRSFLSIITALLGNIPQIIQIIMGIVKAFKGNKRED   |
| NCBI_529L       | LAKRSFLSIITALLGNIPQIIQIIMGIVKAFKGNKRED   |
| NCBI_P60002     | LAKRSFLSIITALLGNIPQIIQIIMGIVKAFKGNKRED   |
| NCBI_HUN64      | IAKRSIIIGIIMGLLTNIPQVINIIMSIIKAFKGNKRED  |
| NCBI_FJ12       | IAKRSIIIGIIMGLLTNIPQVINIIMSIIKAFKGNKRED  |
| 97296-A         | ITKRSIIIGIIMGLLTNIPQVIQIIMSIVRAFKGNKRED  |
| 97296-B         | ITKRSIIIGIIMGLLTNIPQVIQIIMSIVRAFKGNKRED  |
| NCBI_P75010     | ITKRSIIIGIIMGLLTNIPQVIQIIMSIVRAFKGNKRED  |
| 01887           | ITKRSIISIIIMGILSNIPQVIQIIMSIVRAFKGNKRED  |
| 66117           | ITKRSIISIIIMGILSNIPQVIQIIMSIVRAFKGNKRED  |
| NCBI_P76055     | ITKRSIISIIIMGILSNIPQVIQIIMSIVRAFKGNKRED  |
| 14314-B         | ITKRSIISIIIMGILTNIPQVIQIIMSIVRAFKGNKRED  |
| 12753           | ITKRSIISIIIMGILTNIPQVIQIIMSIVRAFKGNKRED  |
| 16884-B         | ITKRSIISIIIMGILTNIPQVIQIIMSIVRAFKGNKRED  |
| 14248           | ITKRSIISIIIMGILTNIPQVIQIIMSIVRAFKGNKRED  |
| 12635-B         | ITKRSIISIIIMGILTNIPQVIQIIMSIVRAFKGNKRED  |
| 17001-B         | ITKRSIISIIIMGILTNIPQVIQIIMSIVRAFKGNKRED  |
| 94976           | ITKRSIISIIIMGILTNIPQVIQIIMSIVRAFKGNKRED  |
| 15890           | ITKRSIISIIIMGILTNIPQVIQIIMSIVRAFKGNKRED  |
| NCBI_VAR1.7     | ITKRSIISIIIMGILTNIPQVIQIIMSIVRAFKGNKRED  |
| NCBI_AU36       | ITKRSIISIIIMGILTNIPQVIQIIMSIVRAFKGNKRED  |
| NCBI_WO-1       | ITKRSIISIIIMGILTNIPQVIQIIMSIVRAFKGNKRED  |
| NCBI_12C        | ITKRSIISIIIMGILTNIPQVIQIIMSIVRAFKGNKRED  |
| NCBI_P37005     | ITKRSIISIIIMGILTNIPQVIQIIMSIVRAFKGNKRED  |
| 16884-A 0.02572 | ITKRSIISIIIMGILTNIPQVIQIIMSIVRAFKGNKRED  |
| 17001-A 0.05263 | ITKRSIIIGIIMGILGNIPQVVIQIIMSIVKAFKGNKRED |
| 18387           | ITKRSIIIGIIMGILGNIPQVIQIIMSIVKAFKGNKRED  |
| 15231           | ITKRSIIIGIIMGILGNIPQVIQIIMSIVKAFKGNKRED  |
| 14314-A         | ITKRSIIIGIIMGILGNIPQVIQIIMSIVKAFKGNKRED  |
| 16850-A         | ITKRSIIIGIIMGILGNIPQVIQIIMSIVKAFKGNKRED  |
| 16850-B         | ITKRSIIIGIIMGILGNIPQVIQIIMSIVKAFKGNKRED  |
| NCBI_P78048     | ITKRSIIIGIIMGILGNIPQVIQIIMSIVKAFKGNKRED  |
| 12635-A         | ITKRSIIIGIIMGILGNIPQVIQIIMSIVKAFKGNKRED  |
| 12522-H         | ITKRSIIIGIIMGILGNIPQVIQIIMSIVKAFKGNKRED  |
| NCBI_CLB42      | ITKRSIIIGIIMGILGNIPQVIQIIMSIVKAFKGNKRED  |
| NCBI_AU90       | ITKRSIIIGIIMGILGNIPQVIQIIMSIVKAFKGNKRED  |
| NCBI_FJ26       | ITKRSIIIGIIMGILGNIPQVIQIIMSIVKAFKGNKRED  |
| NCBI_RIHO13     | ITKRSIIIGIIMGILGNIPQVIQIIMSIVKAFKGNKRED  |
| NCBI_SC5314     | ITKRSIIIGIIMGILGNIPQVIQIIMSIVKAFKGNKRED  |
| NCBI_P34048     | ITKRSIIIGIIMGILGNIPQVIQIIMSIVKAFKGNKRED  |
| NCBI_P57055     | ITKRSIIIGIIMGILGNIPQVIQIIMSIVKAFKGNKRED  |
| NCBI_P94015     | ITKRSIIIGIIMGILGNIPQVIQIIMSIVKAFKGNKRED  |
| NCBI_19F        | ITKRSIIIGIIMGILGNIPQVIQIIMSIVKAFKGNKRED  |
| NCBI_P37039     | ITKRSIIIGIIMGILGNIPQVIQIIMSIVKAFKGNKRED  |

:.\*\*\*\*:. . \* . \* \*\*\*\*:. \* \* . :. :.\*\*\*\*\*

Figure S1. Sala et al.
