# Supplementary material for: A New Phenotype in Candida-Epithelial Cell Interaction Distinguishes Colonization- versus Vulvovaginal Candidiasis-Associated Strains
Source: PubMed Central journal article supplement (PMC10128025; doi:10.1128/mbio.00107-23), 2023-03-01

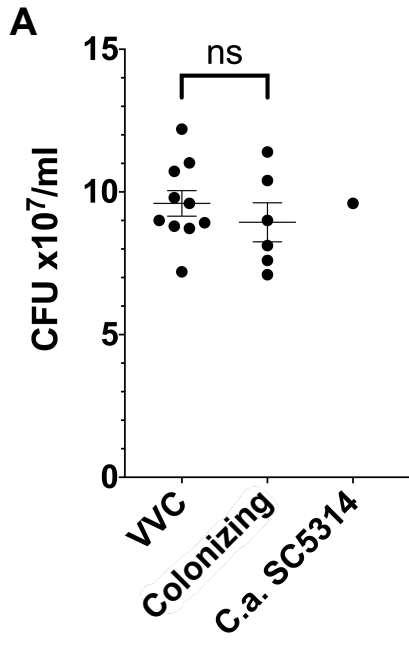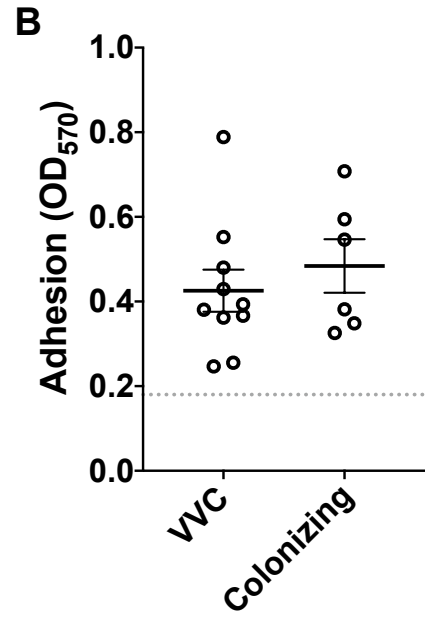

Supplement: mbio.00107-23-s0002.pdf [file mbio.00107-23-s0002.pdf]
